# Supplementary material for: Goethite/montmorillonite adsorption coupled with electrocoagulation for improving fluoride removal from aqueous solutions
Source: Royal Society of Chemistry journal article supplement (doi:10.1039/d1ra08503d), 2022-01-01
Supplement: d1ra08503d1.pdf [file d1ra08503d1.pdf]

## Supplementary materials

**Tab. S1.** Variable coding and level of RSM

| Variable                                    | Coding | Level |    |    |
|---------------------------------------------|--------|-------|----|----|
|                                             |        | -1    | 0  | 1  |
| Time (min)                                  | A      | 30    | 60 | 90 |
| Current density ( $\text{mA}/\text{cm}^2$ ) | B      | 6     | 12 | 18 |
| Initial pH                                  | C      | 5     | 7  | 9  |

*The choice of data for three variables was depended on the results of single-factor experiment. Through the removal performance of the three factors in different horizontal conditions, the appropriate removal level was obtained as the center point, and take the numbers with the same difference on both sides of central point as the other two levels. Based on the costs, the optimal conditions which were 60 min, 12  $\text{mA}/\text{cm}^2$  and initial  $\text{pH}=7$  were obtained. After determined the data, we did 17 experiments according to Tab. S1.*

---

**Tab. S2.** Test scheme and results

| Number | A  | B  | C  | Removal<br>rate (%) |
|--------|----|----|----|---------------------|
| 1      | 0  | 0  | 0  | 94.76               |
| 2      | 1  | 1  | 0  | 97.42               |
| 3      | 0  | 1  | -1 | 91.31               |
| 4      | 0  | -1 | -1 | 80.7                |
| 5      | 0  | 0  | 0  | 96.17               |
| 6      | -1 | -1 | 0  | 61.43               |
| 7      | 1  | 0  | -1 | 92.92               |
| 8      | -1 | 1  | 0  | 75.66               |
| 9      | 0  | 0  | 0  | 96.14               |
| 10     | -1 | 0  | -1 | 69.17               |
| 11     | 0  | -1 | 1  | 68.96               |
| 12     | 0  | 1  | 1  | 81.47               |
| 13     | 0  | 0  | 0  | 96.27               |
| 14     | 1  | -1 | 0  | 90.94               |
| 15     | 0  | 0  | 0  | 94.19               |
| 16     | 1  | 0  | 1  | 81.6                |
| 17     | -1 | 0  | 1  | 57.5                |

---

**Tab. S3.** Analysis of variance of regression model

| Source                        | Sum of squares | df | Mean square | F value | P value  |
|-------------------------------|----------------|----|-------------|---------|----------|
| Model                         | 2771.04        | 9  | 307.89      | 350.36  | < 0.0001 |
| A                             | 1228.10        | 1  | 1228.10     | 1397.49 | < 0.0001 |
| B                             | 240.13         | 1  | 240.13      | 273.26  | < 0.0001 |
| C                             | 248.31         | 1  | 248.31      | 282.56  | < 0.0001 |
| AB                            | 15.02          | 1  | 15.02       | 17.09   | 0.0044   |
| AC                            | 0.031          | 1  | 0.031       | 0.035   | 0.8572   |
| BC                            | 0.90           | 1  | 0.90        | 1.03    | 0.3446   |
| A <sup>2</sup>                | 398.46         | 1  | 398.46      | 453.42  | < 0.0001 |
| B <sup>2</sup>                | 82.09          | 1  | 82.09       | 93.41   | < 0.0001 |
| C <sup>2</sup>                | 462.49         | 1  | 462.49      | 526.28  | < 0.0001 |
| Residual                      | 6.15           | 7  | 0.88        |         |          |
| Lack of Fit                   | 2.44           | 3  | 0.81        | 0.87    | 0.5249   |
| Pure Error                    | 3.71           | 4  | 0.93        |         |          |
| Cor Total                     | 2777.20        | 16 |             |         |          |
| R <sup>2</sup>                | 0.9978         |    |             |         |          |
| R <sub>adj</sub> <sup>2</sup> | 0.9949         |    |             |         |          |
